# Supplementary material for: Femtoliter nanofluidic valve utilizing glass deformation
Source: Royal Society of Chemistry journal article supplement (doi:10.1039/c8lc01340c), 2019-01-01
Supplement: c8lc01340c2.pdf [file c8lc01340c2.pdf]

Supplementary Figures:

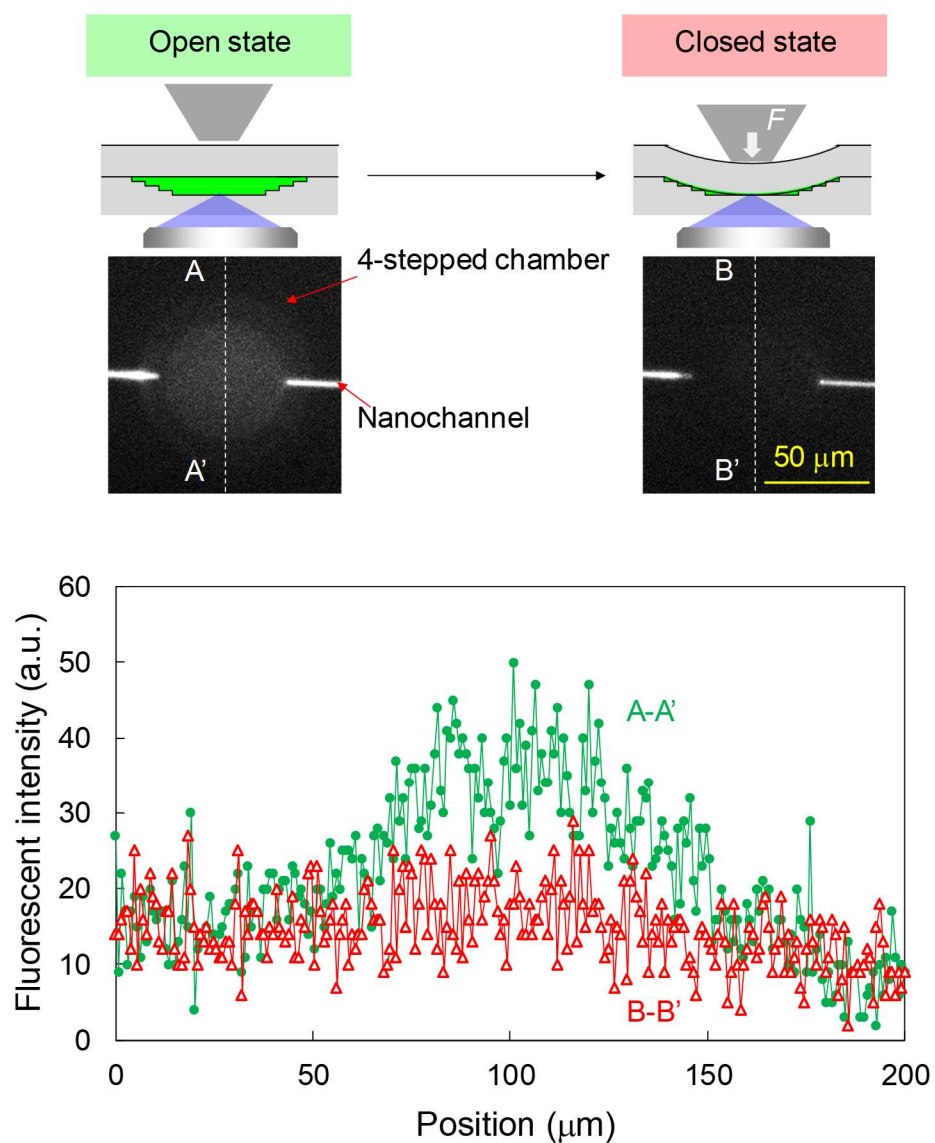

**Figure S1.** Profiles of the image intensity along the four-stepped valve chamber at open and closed states.

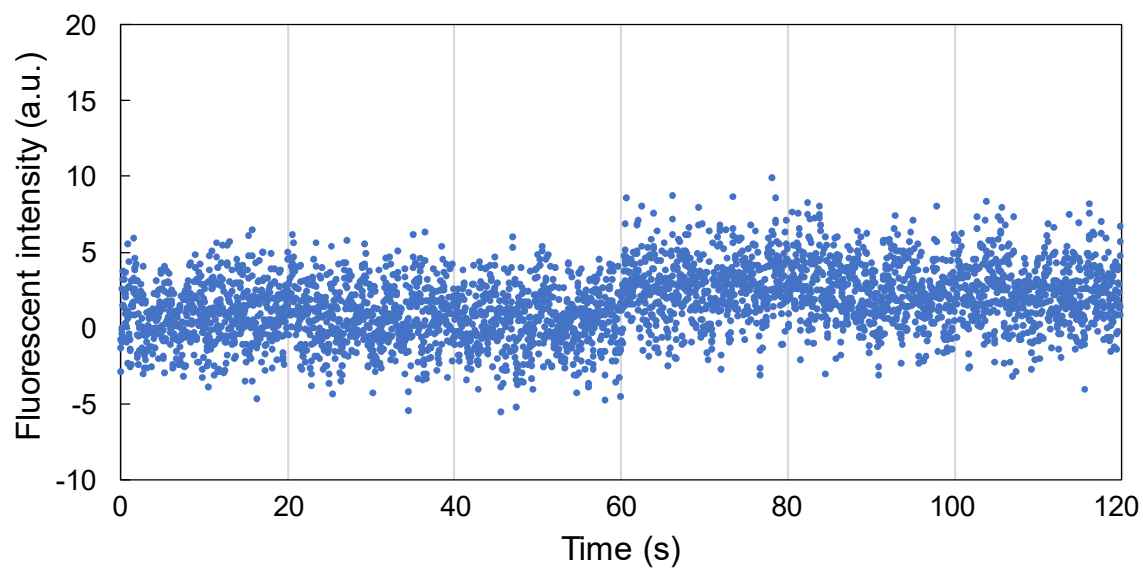

**Figure S2.** The fluorescent intensity-time profile at downstream nanochannel ( $x = 0 \mu\text{m}$ ) during the closed state. It is a magnified graph of Figure 9. Noted that the fluorescent intensity was obtained by subtracting a background intensity from the image intensity.
