# Supplementary material for: Femtoliter nanofluidic valve utilizing glass deformation
Source: Royal Society of Chemistry journal article supplement (doi:10.1039/c8lc01340c), 2019-01-01
Supplement: c8lc01340c3.pdf [file c8lc01340c3.pdf]

## Electronic Supplementary Information

**Video S1.** Video of repeated operations of the nanochannel open/close valve at a 180 s period (130× speed).

**Video S2.** Video of injection of fluorescein solution into the nanochannel under a 100 kPa pressure by opening the fL-valve (1× speed).
